## CORRECTION

# Correction: Trajectory analyses in insurance medicine studies: Examples and key methodological aspects and pitfalls

Laura Serra, Kristin Farrants, Kristina Alexanderson, Mónica Ubalde, Tea Lallukka

## Notice of Republication

An incorrect version of Fig 1 was published in error. This article was republished on November 22, 2024 to correct for this error. Please download this article again to view the correct version.

## Reference

1. Serra L, Farrants K, Alexanderson K, Ubalde M, Lallukka T (2022) Trajectory analyses in insurance medicine studies: Examples and key methodological aspects and pitfalls. PLoS ONE 17(2): e0263810. <https://doi.org/10.1371/journal.pone.0263810> PMID: [35148351](https://pubmed.ncbi.nlm.nih.gov/35148351/)

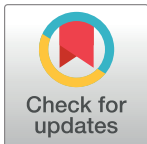

## OPEN ACCESS

**Citation:** Serra L, Farrants K, Alexanderson K, Ubalde M, Lallukka T (2024) Correction: Trajectory analyses in insurance medicine studies: Examples and key methodological aspects and pitfalls. PLoS ONE 19(12): e0315775. <https://doi.org/10.1371/journal.pone.0315775>

**Published:** December 10, 2024

**Copyright:** © 2024 Serra et al. This is an open access article distributed under the terms of the [Creative Commons Attribution License](https://creativecommons.org/licenses/by/4.0/), which permits unrestricted use, distribution, and reproduction in any medium, provided the original author and source are credited.
